# Supplementary material for: Evaluation of remote sensing and reanalysis based precipitation products for agro-hydrological studies in semi-arid tropics of Tamil Nadu
Source: Copernicus journal article supplement (doi:10.5194/egusphere-2024-2369), 2024-09-09

## Supplementary Figure

**Figure S1 Occurrence frequency of precipitation (0-1 mm) for (a) Coimbatore, (b) Madurai, (c) Tiruchirapalli and (d) Tuticorin**

a) Rainfall Products: 0-1 mm Occurrence frequency - Coimbatore

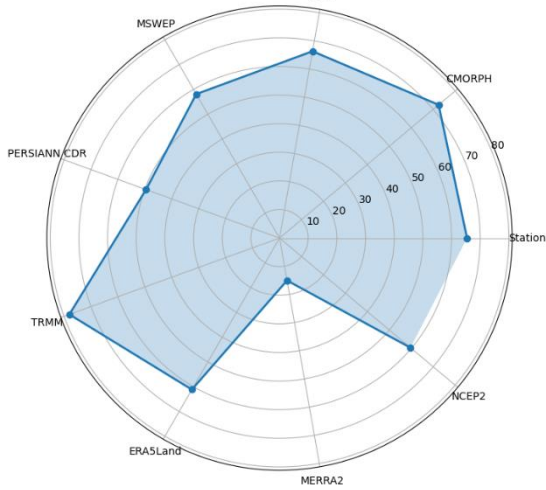

b) Rainfall Products: 0-1 mm Occurrence frequency - Madurai

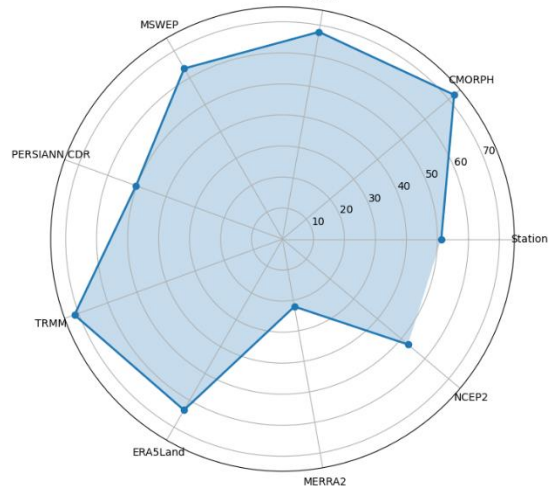

c) Rainfall Products: 0-1 mm Occurrence frequency - Tiruchirapalli

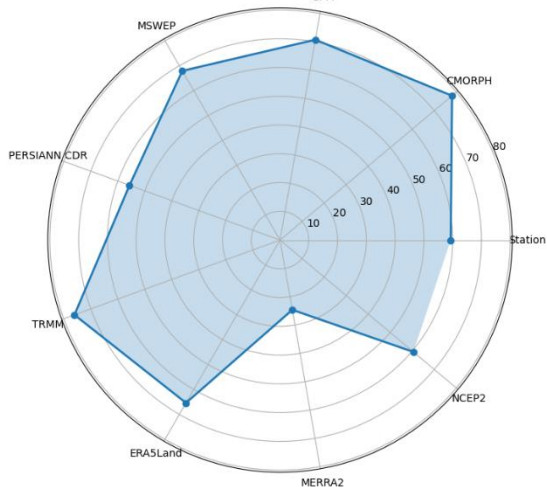

d) Rainfall Products: 0-1 mm Occurrence frequency - Tuticorin

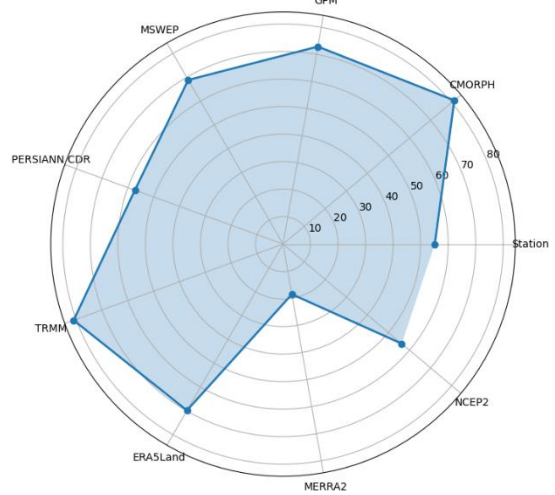

**Figure S2 Occurrence frequency of precipitation (1-> 50 mm) for (a) Coimbatore, (b) Madurai, (c) Tiruchirapalli and (d) Tuticorin**

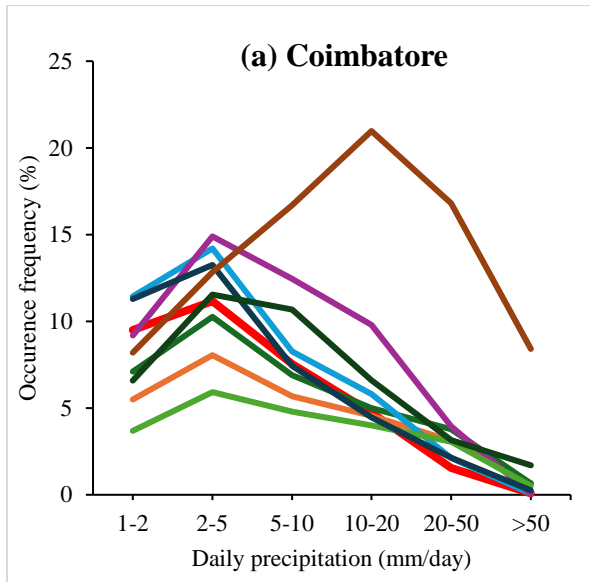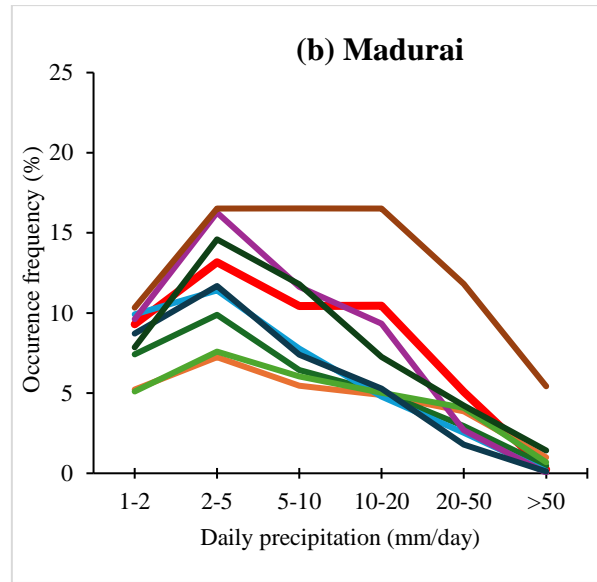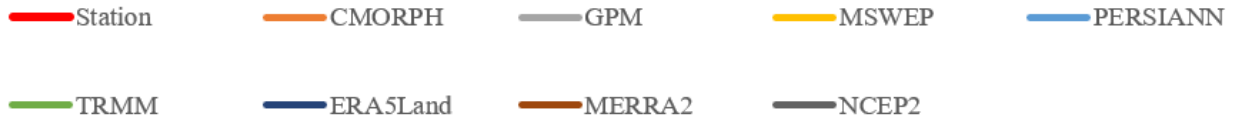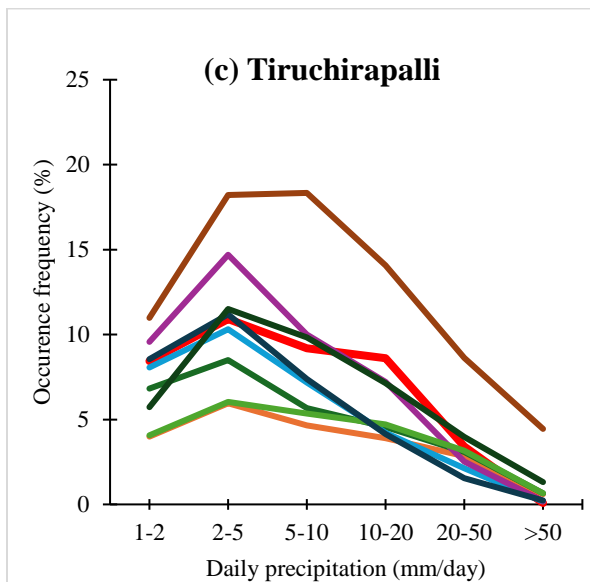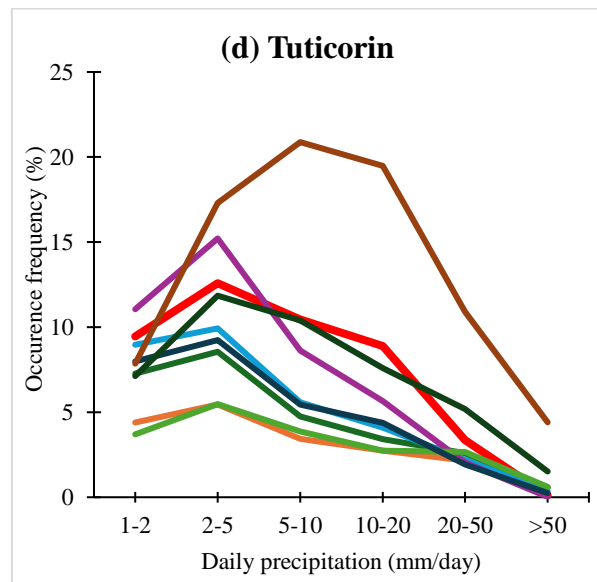

**Figure S3** Taylor diagram depicting the agreement between station data and precipitation products at a yearly district scale

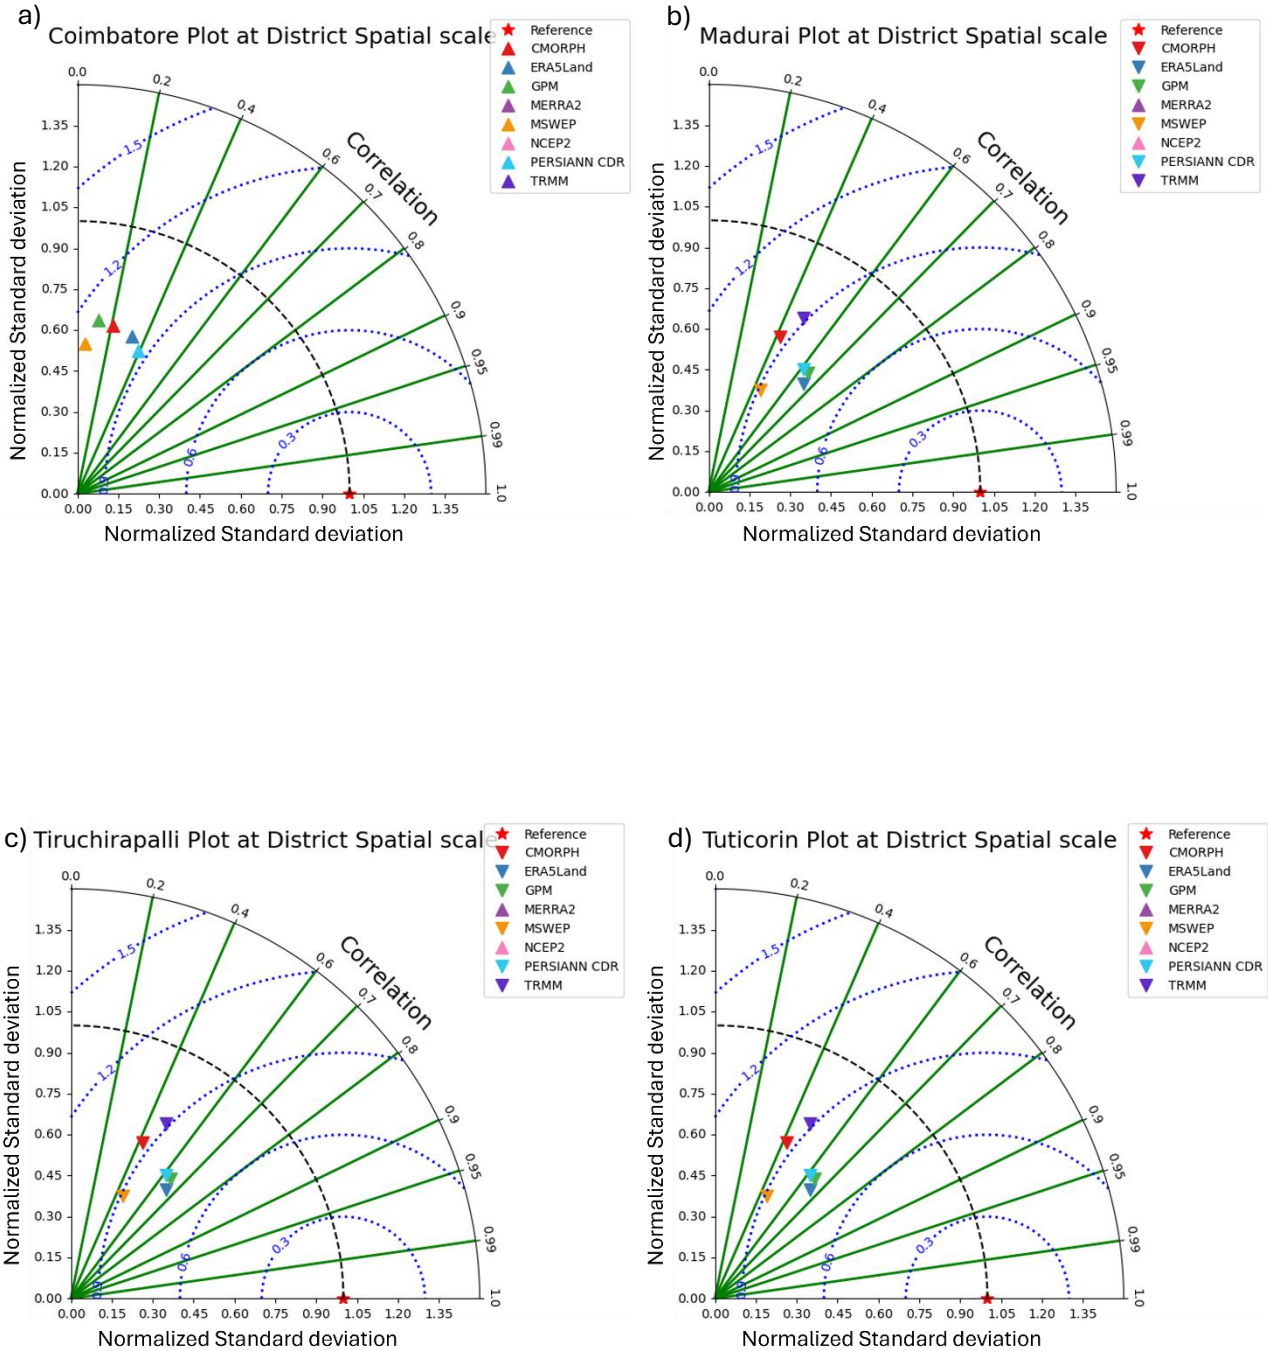

**Figure S4** Combined Taylor diagram depicting the agreement between station data and precipitation products at a) yearly grid scale b) monsoon months c) non-monsoon months

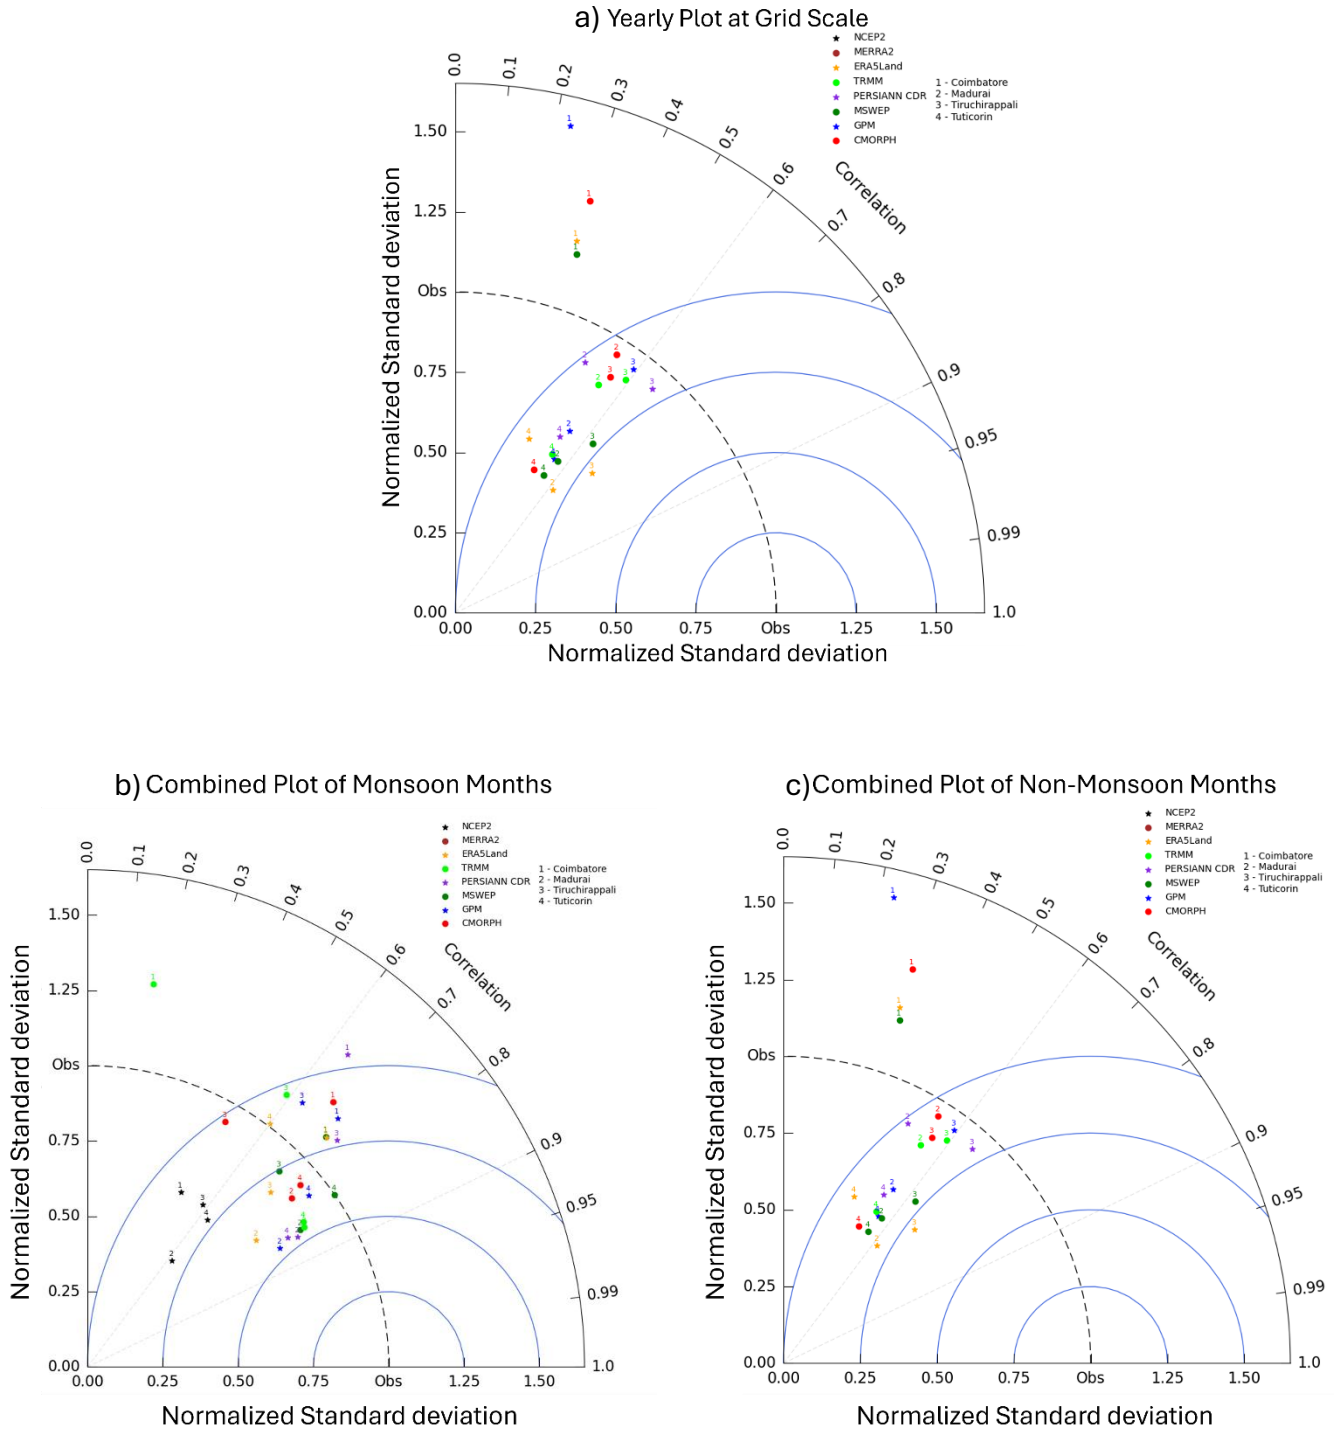

Supplement: Supplementary file 1 [file egusphere-2024-2369-supplement.pdf]
