# Supplementary material for: Evaluation of remote sensing and reanalysis based precipitation products for agro-hydrological studies in semi-arid tropics of Tamil Nadu
Source: Copernicus journal article supplement (doi:10.5194/egusphere-2024-2369), 2024-09-09
Supplement: Supplementary file [file egusphere-2024-2369-AC1-supplement.pdf]

The precipitation products evaluated in the study was chosen based on their underlying theory, performance in similar climatic conditions, available spatial and temporal resolution.

Validity of the Gauge-free evaluation like TC method depend on each dataset being an independent estimate of the truth (Stoffelen 1998). The precipitation products used in the present study have certain overlap in the observation techniques and equipment used to generate the retrieval. For instance, satellite-based products, use measurements from infrared and/or microwave sensors as the basis for their precipitation estimates. Reanalysis and gauge-based products also incorporate measurements from many of the same observation station. This violates the assumption of zero error cross correlation, which can lead to bias in TC estimates (Gruber et al. 2016). Further, considering this assumption would have greatly restricted the products to be considered in the study.

Previous studies evaluating TC method considered products which hasn't been previously evaluated for climatic conditions in India (Duan et al. 2021, Lu et al. 2021). For instance, soil moisture based precipitation product SM2RAIN-ASCAT hasn't been evaluated in similar Indian climatic zones. Further, the product isn't available prior to 2007 for conducting an initial assessment with the station data. Directly evaluating such products can violate the assumptions of TC and lead to higher uncertainty in the estimates.

Another major drawback of this methodology is that it requires log transformation data preprocessing. This requires either to remove the days with zero rainfall (Massari et al. 2017) or to replace with very small value such as  $10^{-4}$  (Duan et al. 2021). So far, clear conclusion hasn't been reached for zero precipitation days and this will produce a noticeable impact on RMSE (Lu et al. 2021). As semi arid regions are considered in the present study where there are higher number of days with zero rainfall, this will influence the accuracy of evaluation results. Hence, despite the station data being almost decade old, it will provide the most direct and accurate representation of the study region for evaluation.

## References

- Duan, Z., Duggan, E., Chen, C., Gao, H., Dong, J., & Liu, J. (2021). Comparison of traditional method and triple collocation analysis for evaluation of multiple gridded precipitation products across Germany. *Journal of Hydrometeorology*, 22(11), 2983-2999.
- Gruber, A., and Coauthors, 2016: Recent advances in (soil moisture) triple collocation analysis. *Int. J. Appl. Earth Obs. Geoinf.*, 45, 200–211, <https://doi.org/10.1016/j.jag.2015.09.002>.
- Lu, X., Tang, G., Liu, X., Wang, X., Liu, Y., & Wei, M. (2021). The potential and uncertainty of triple collocation in assessing satellite precipitation products in Central Asia. *Atmospheric Research*, 252, 105452.
- Marshall, G.J., 2002. Trends in Antarctic geopotential height and temperature: A comparison between radiosonde and NCEP–NCAR reanalysis data. *J. Clim.* 15 (6), 659–674.
- Stoffelen, A., 1998: Toward the true near-surface wind speed: Error modeling and calibration using triple collocation. *J. Geophys. Res.*, 103, 7755–7766, <https://doi.org/10.1029/97JC03180>.
