# Supplementary material for: Evaluation of remote sensing and reanalysis based precipitation products for agro-hydrological studies in semi-arid tropics of Tamil Nadu
Source: Copernicus journal article supplement (doi:10.5194/egusphere-2024-2369), 2024-09-09
Supplement: Supplementary file [file egusphere-2024-2369-AC4-supplement.pdf]

**1. Comment: L 38:** Citation required

**Response:** The following reference will be added to the revised manuscript: [Government of Tamil Nadu, \(2022a\)](#).

**2. Comment: L 46:** Citation required

**Response:** The following references will be added to the revised manuscript: [Arjune and Kumar \(2023\)](#), [Balaganesh et al. \(2020\)](#), [Gardas et al. \(2018\)](#), [Malaiarasan et al. \(2021\)](#).

**3. Comment: L 53:** Citation required

**Response:** The following references will be added to the revised manuscript: [Radhakrishnan et al. \(2024\)](#), [Lalmuanzuala et al. \(2023\)](#), [Paramasivam \(2023\)](#)

**4. Comment:** Citation required

**Response:** The reference was taken from IPCC Sixth Assessment Report ([IPCC, 2023](#))

**5. Comment: L 77:** Table

**Response:** Required changes will be made in the revised manuscript.

**6. Comment:** This part is not required in the introduction, and it can be included in the dataset

**Response:** As suggested by the reviewer, the section will be removed from the Introduction and included in the 'Dataset'.

**7. Comment:** ~~precipitation~~

**Response:** Required changes will be made in the revised manuscript.

**8. Comment: L 119:** Study region

**Response:** To avoid redundancy in the information presented, Section 2.1 and Section 3.1 will be merged in the revised manuscript.

**9. Comment: L 127:** long-term variability and change can also be represented to show the changes in pattern

**Response:** The precipitation pattern showed inter-annual variability, as shown in the figure below. The year 2008 recorded the highest precipitation, whereas the year 2012 indicated the lowest. The results of the Mann-Kendall test (MK-test) indicated no significant trend in the annual precipitation for these four regions.

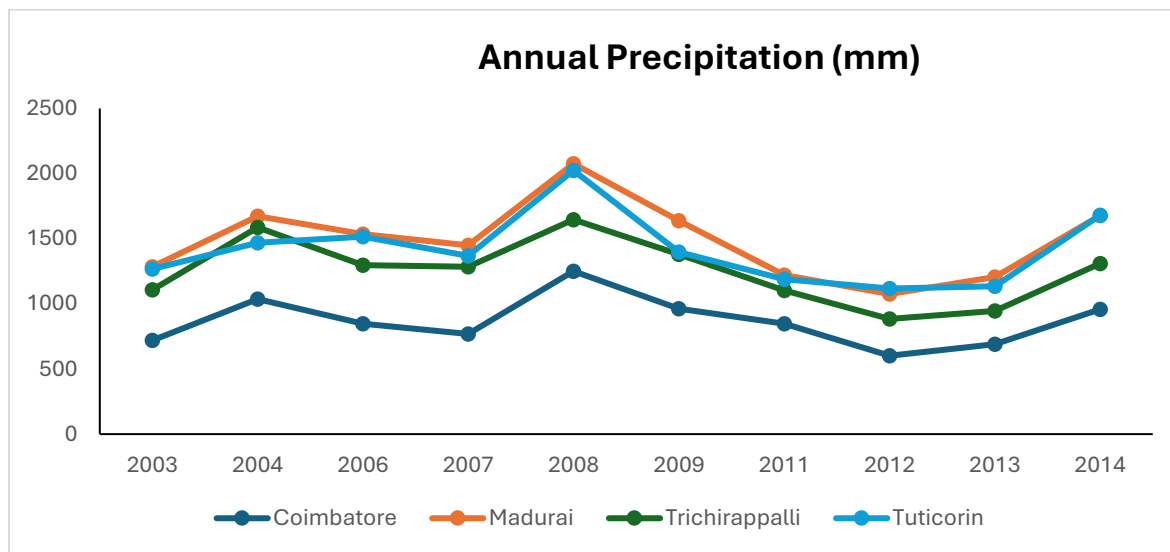

**10. Comment: L 144:** Highest spatial resolution

**Response:** We selected products with spatial resolutions between 0.1° and 0.25°. While reanalysis products typically have coarser resolutions, we included MERRA2 and NCEP2 in our selection due to their unique advantages. Both products provide global coverage on a daily timescale and incorporate significant advancements. For example, NCEP2 improves precipitation parameterizations using cloud-top cooling ([Kanamitsu et al., 2002](#)), while MERRA2 integrates atmospheric aerosols into its analysis ([Bosilovich et al., 2015](#)).

**11. Comment: L 235:** Methodology can be as section 2, and the study region should come as sub-section. Then, there won't be any repetition of the sections. Section 2.1 and 3.1 are repeating, these can be combined together

**Response:** We will merge sections 2.1 and 3.1 to avoid redundancy. So, the revised section now looks like,

1. Introduction
2. Methodology
  - 2.1 Study region and Ground station
  - 2.2 Datasets
  - 2.3 Comparison of ground data with satellite and observational reanalysis-based data
    - 2.3.1 Grid scale comparison
    - 2.3.2 District scale comparison
  - 2.4 Evaluation metrics
3. Results
4. Discussion
5. Conclusion

**12. Comment: L 251:** what was the duration of data used to compare

**Response:** The study used 10 years of precipitation data for evaluation of the products. Many previous studies have used the approach of interpolating station data onto a grid and then conducting evaluations using the grid-to-grid method ([Duan et al. 2016](#), [Liu et al. 2015](#), [Shukla et al. 2019](#)). The present study adopted this approach to align with the commonly used practice.

**13. Comment: L 261:** Evaluation can be included as a separate sub-heading as section 3.3

**Response:** ‘Evaluation metrics’ will be included as a separate sub-heading in the revised manuscript. Section in the revised manuscript as response to Comment: 12.

**14. Comment: L 734:** The bullet points can be avoided in conclusion

**Response:** We thank the reviewer for the suggestion. Conclusion will be presented as a paragraph in the revised manuscript.

**15. Comment: L 747:** So the study can not generalise the use if any precipiattion data. Is ERA5 can be adopted to other similar agro-climatic conditions? What is the

contribution of this study towards other data-sparse regions in India, other than the selected 4 locations? good to include future prospect.

**Response:** The following section on future prospects will be included in the revised manuscript:

The results of the study can be useful for the districts falling within the same agro-climatic regions. The state of the Tamil Nadu is divided into 7 agroclimatic zones. The present study includes 3 important agricultural zones. The results can be used for other districts within the same agroclimatic zones. The findings of this study are designed to support field-level experimentation and also provide a proof of concept for modelers developing climate data products, with the potential for extrapolation to other regions with similar agro-climatic conditions.

#### **References:**

- Arjune, S., & Kumar, V. S. (2023, February). Precision Agriculture: Influencing factors and challenges faced by farmers in delta districts of Tamil Nadu. In *2022 OPIU International Technology Conference on Emerging Technologies for Sustainable Development (OTCON)* (pp. 1-6). IEEE.
- Balaganesh, G., Malhotra, R., Sendhil, R., Sirohi, S., Maiti, S., Ponnusamy, K., & Sharma, A. K. (2020). Development of composite vulnerability index and district level mapping of climate change induced drought in Tamil Nadu, India. *Ecological Indicators*, 113, 106197.
- Bosilovich, M. G., Lucchesi, R., and Suarez, M.: MERRA-2: File specification, 2015.
- Duan, Z., Liu, J., Tuo, Y., Chiogna, G., and Disse, M.: Evaluation of eight high spatial resolution gridded precipitation products in Adige Basin (Italy) at multiple temporal and spatial scales, *Science of the Total Environment*, 573, 1536–1553, <https://doi.org/10.1016/j.scitotenv.2016.08.213>, 2016.
- Gardas, B. B., Raut, R. D., & Narkhede, B. (2018). Evaluating critical causal factors for post-harvest losses (PHL) in the fruit and vegetables supply chain in India using the DEMATEL approach. *Journal of cleaner production*, 199, 47-61.
- Government of Tamil Nadu: Statistical Handbook 2020-21: Sub chapter: Rainfall, 2022a.

IPCC, 2023: Summary for Policymakers. In: Climate Change 2023: Synthesis Report. Contribution of Working Groups I, II and III to the Sixth Assessment Report of the Intergovernmental Panel on Climate Change [Core Writing Team, H. Lee and J. Romero (eds.)]. IPCC, Geneva, Switzerland, pp. 1-34, doi: 10.59327/IPCC/AR6-9789291691647.001

Kanamitsu, M., Ebisuzaki, W., Woollen, J., Yang, S.-K., Hnilo, J. J., Fiorino, M., and Potter, G. L.: Ncep–doe amip-ii reanalysis (r-2), Bull Am Meteorol Soc, 83, 1631–1644, 2002.

LALMUANZUALA, B., SATHYAMOORTHY, N., KOKILAVANI, S., JAGADEESWARAN, R., & KANNAN, B. (2023). Drought analysis in southern region of Tamil Nadu using meteorological and remote sensing indices. *MAUSAM*, 74(4), 973-988.

Liu, J., Duan, Z., Jiang, J., Zhu, A.X., 2015. Evaluation of three satellite precipitation products TRMM 3B42, CMORPH, and PERSIANN over a subtropical watershed in China. Adv. Meteorol. 2015 <https://doi.org/10.1155/2015/151239>.

Malaizarasan, U., Paramasivam, R., & Felix, K. T. (2021). Crop diversification: determinants and effects under paddy-dominated cropping system. *Paddy and Water Environment*, 19, 417-432.

Paramasivam P (2023) Hundreds stranded as parts of India's Tamil Nadu flooded after heavy rain, *Reuters*: [Hundreds stranded as parts of India's Tamil Nadu flooded after heavy rain | Reuters](#)

Radhakrishnan, S., Duraisamy Rajasekaran, S. K., Sujatha, E. R., & Neelakantan, T. R. (2024). A Comparative Study on 2015 and 2023 Chennai Flooding: A Multifactorial Perspective. *Water*, 16(17), 2477.

Shukla, A.K., Ojha, C.S.P., Singh, R.P., Pal, L., Fu, D., 2019. Evaluation of TRMM precipitation dataset over Himalayan Catchment: the upper Ganga Basin, India. *Water (Switzerland)* 11 (3). <https://doi.org/10.3390/w11030613>.
